# Supplementary material
Source: publisher figshare collection journal article supplement (https://frontiersin.figshare.com/ndownloader/files/31045936)

## Supplementary figure 1

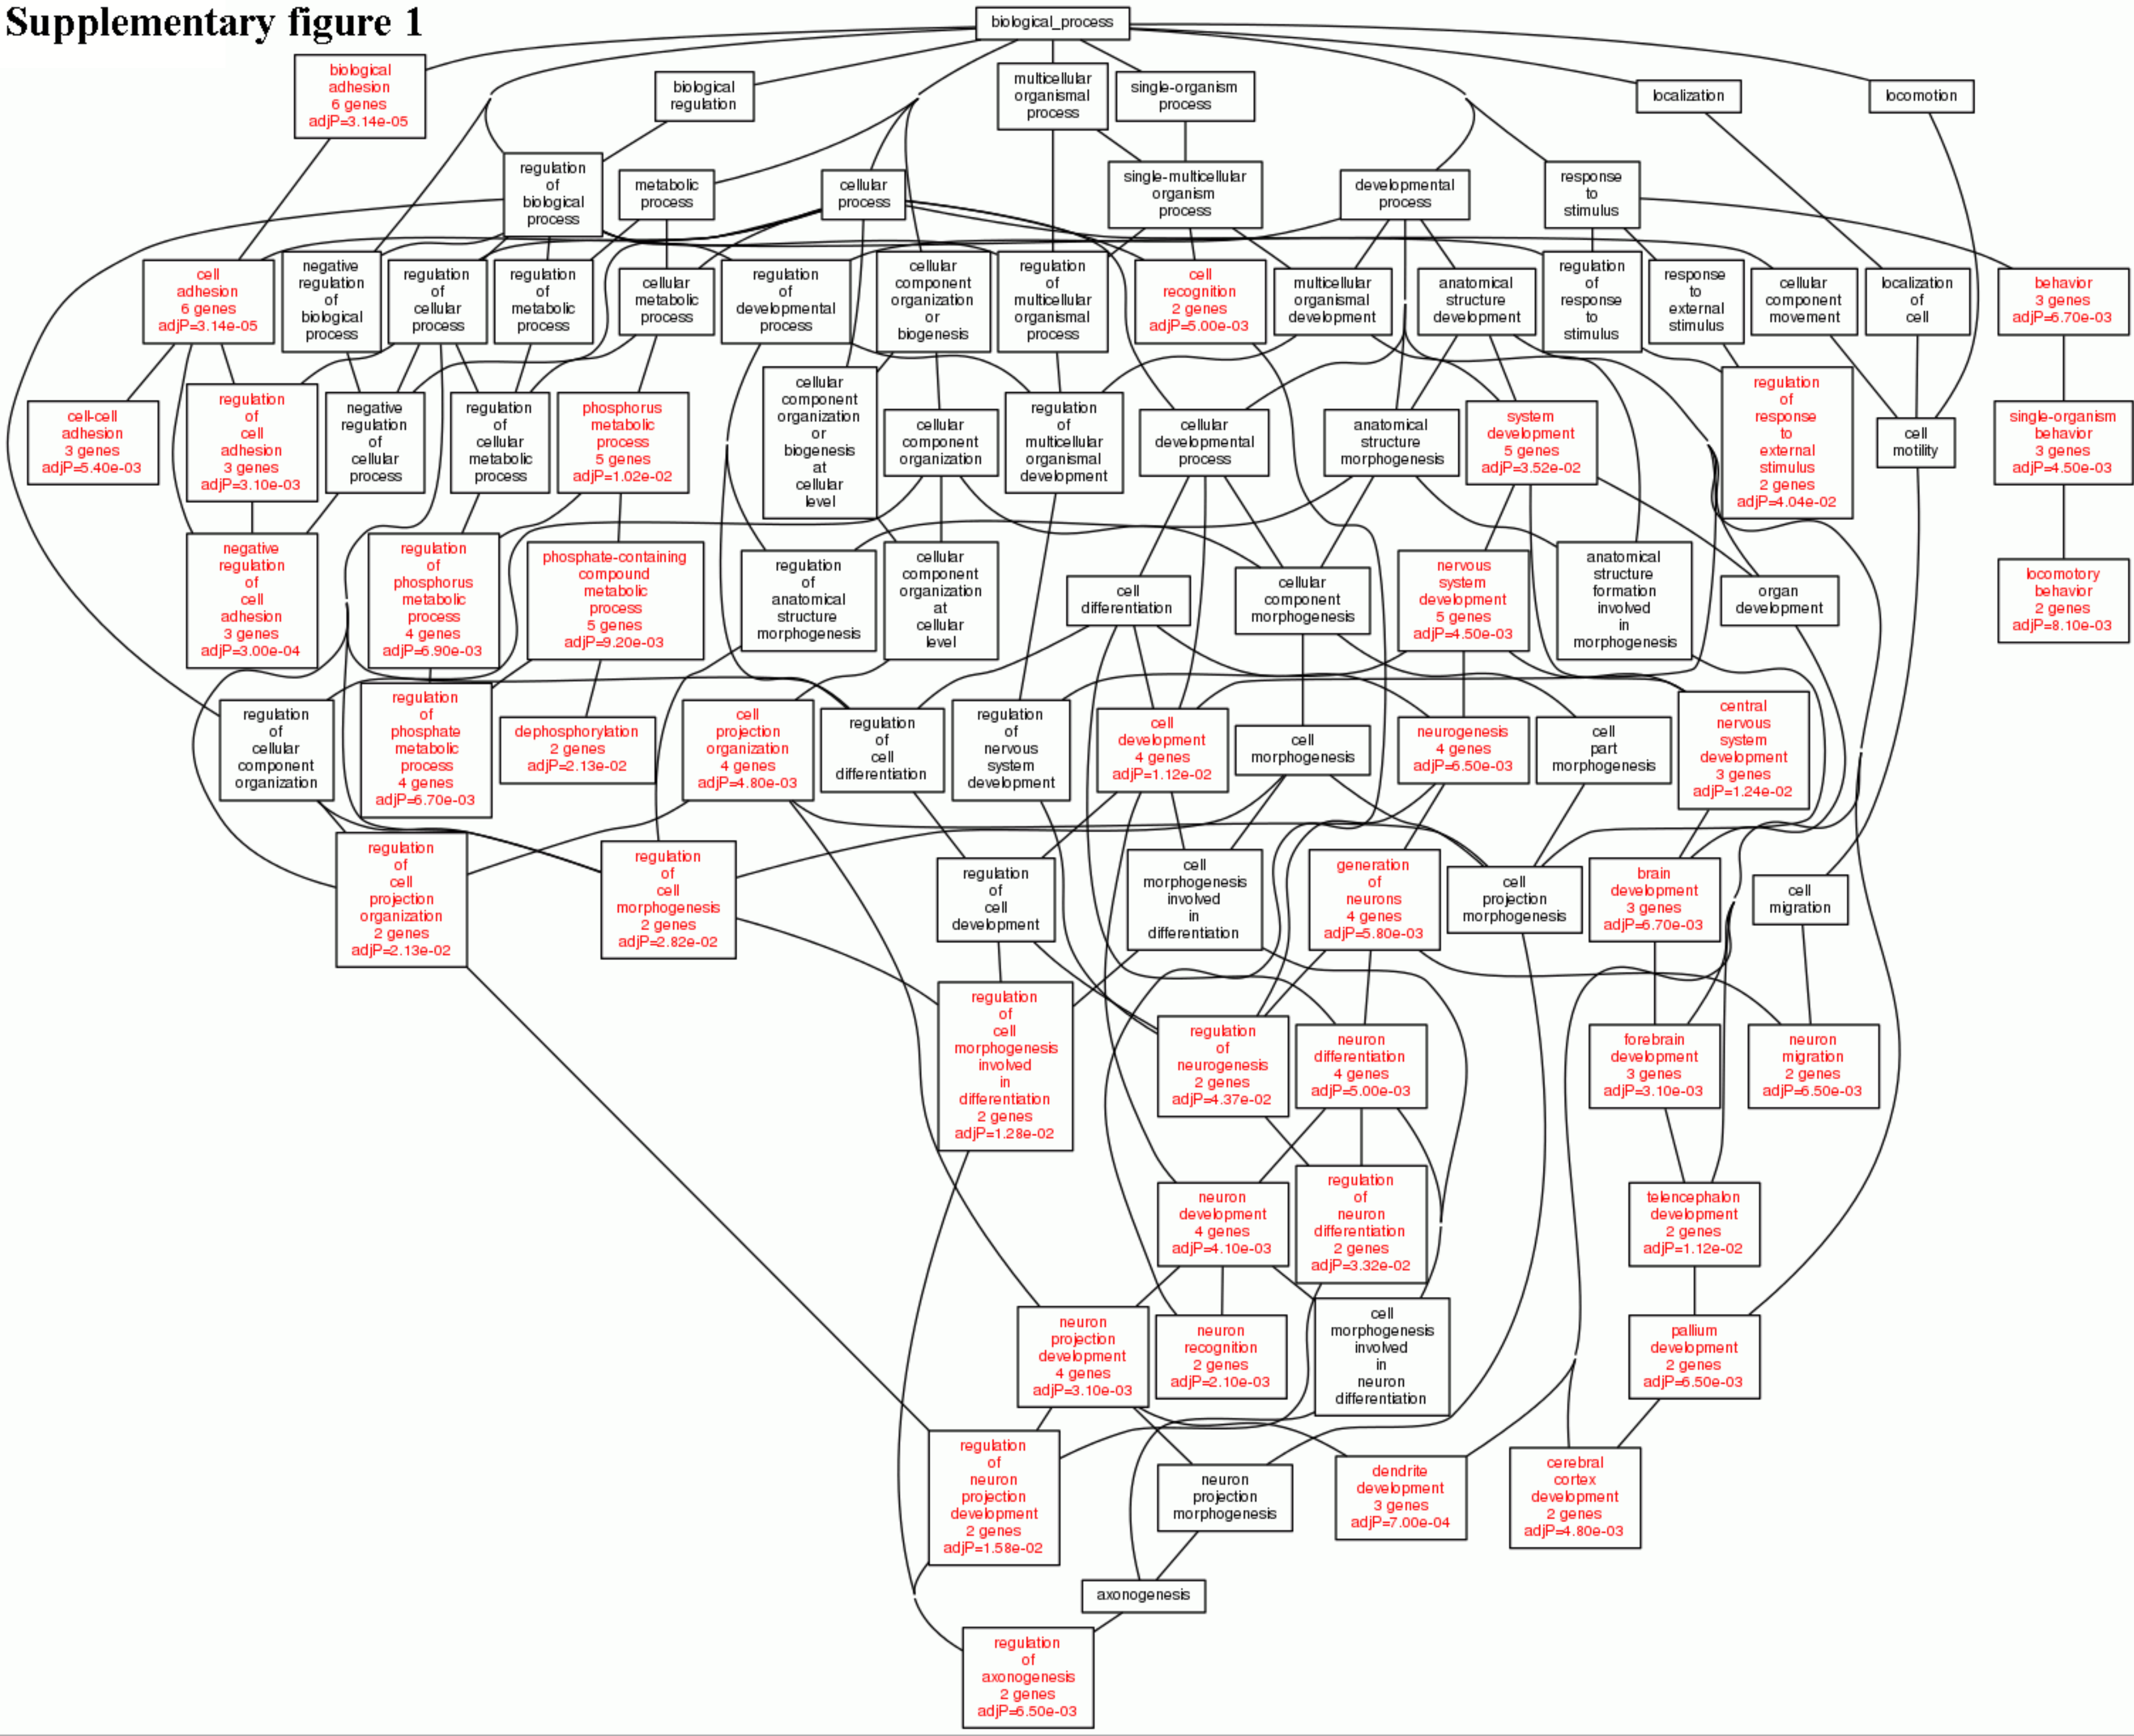

Supplement: Supplementary file [file 31045936]
